# Supplementary material
Source: publisher figshare collection journal article supplement (https://acs.figshare.com/ndownloader/files/21787899)
Supplement: Supplementary file 1 [file 21787899]

## Supporting Information

### Porosity-Induced Selective Sensing of Iodide in Aqueous Solution by a Fluorescent Imidazolium-Based Ionic Porous Framework

Zixu Chen, Ruixue Sun, Shengyu Feng, Dengxu Wang,\* Hongzhi Liu

*National Engineering Research Center for Colloidal Materials & Key Laboratory of  
Special Functional Aggregated Materials, Ministry of Education, School of Chemistry  
and Chemical Engineering, Shandong University, Jinan, Shandong, 250100, China*

\*Corresponding author's e-mail: dxwang@sdu.edu.cn

#### Table of contents

#### Characterization

**Figure S1.** TGA curve of IPF under N<sub>2</sub> atmosphere with a heating rate of 10°C min<sup>-1</sup>

**Figure S2.** PXRD pattern of IPF

**Figure S3.** FE-SEM image of IPF

**Figure S4.** Particle size distribution of IPF suspension in water (5.0 mM)

**Figure S5.** Stern–Volmer plot for IPF dispersion in the presence of I<sup>-</sup> (R<sup>2</sup> = 0.997)

**Figure S6.** Plot of emission intensity at 400 nm versus the concentration of I<sup>-</sup> (1 ~ 10 μM)

**Figure S7.** (a-b) Nitrogen adsorption-desorption isotherms (a) and pore size distribution curves (b) of IPF prepared with the reaction times at 12 h, 24 h, 36 h, and 48 h.

**Figure S8.** (a, c, e) Fluorescence quenching spectra of IPF prepared with the reaction time at 12 h (a), 24 h (c), and 36 h (e) suspensions in water (0.1 mg/mL) with various concentrations of I<sup>-</sup> (0 ~ 1×10<sup>-3</sup> mol/L, λ<sub>ex</sub> = 345 nm). The insets show the photographs of Stern–Volmer plot for IPF-12h (R<sup>2</sup> = 0.927), IPF-24h (R<sup>2</sup> = 0.977), IPF-36h (R<sup>2</sup> = 0.952) suspensions in the presence of I<sup>-</sup>. (b, d, f) Plot of emission

intensity of IPF prepared with the reaction time at 12 h (b), 24 h (d), and 36 h (f) suspensions versus the concentration of  $I^-$  ( $1 \sim 10 \mu M$ ).

**Figure S9.** (a-b) The idealized geometry of IPF sensing  $Br^-$  by placing one iodide ion outside (a) and inside the pore (b) optimized by Material studio 8.0 using as the force field.

**Figure S10.** The pH effect on the detection performance of IPF dispersion in the absence and presence of  $I^-$

**Figure S11.** Stern–Volmer plot ( $0 \sim 600 \mu M$ ) for the paper strips in the presence of  $I^-$  ( $R^2 = 0.9874$ )

**Figure S12.** Plot of emission intensity at 405 nm versus the concentration of  $I^-$  ( $1 \sim 10 \mu M$ )

**Figure S13.** BET plot of IPF prepared with the reaction time at 12 h

**Figure S14.** BET plot of IPF prepared with the reaction time at 24 h

**Figure S15.** BET plot of IPF prepared with the reaction time at 36 h

**Figure S16.** BET plot of IPF prepared with the reaction time at 48 h

**Table S1.** Porosity data of IPF prepared with the reaction times at 12h, 24h, 36h, and 48 h.

## Characterization

Fourier transform infrared (FT-IR) spectra was measured within a  $4000$  to  $400 \text{ cm}^{-1}$  region on a Bruker TENSOR-27 infrared spectrophotometer (KBr pellet).  $^1H$  NMR and  $^{13}C$  NMR in solution, solid-state  $^{13}C$  cross-polarization/magic-angle-spinning (CP/MAS) NMR and  $^{29}Si$  MAS NMR data were collected on Bruker AVANCE-500 NMR Spectrometer operating at a magnetic field strength of 9.4 T. The resonance

frequencies at this field strength were 125 and 99 MHz for  $^{13}\text{C}$  NMR and  $^{29}\text{Si}$  NMR, respectively. A chemagnetics 5 mm triple-resonance MAS probe was used to acquire  $^{13}\text{C}$  and  $^{29}\text{Si}$  NMR spectra.  $^{29}\text{Si}$  MAS NMR spectrum with high power proton decoupling was recorded using a  $\pi/2$  pulse length of 5  $\mu\text{s}$ , a recycle delay of 120 s and a spinning rate of 5 kHz. Elemental analysis was performed using an Elementar vario EL III elemental analyzer.

Thermogravimetric analysis (TGA) was performed under  $\text{N}_2$  using a TA SDTQ600 at a temperature range of room temperature to 800°C with a heating rate of 10°C  $\text{min}^{-1}$ . Field-emission scanning electron microscopy (FE-SEM) experiments were performed by using HITACHI S4800 Spectrometer. The particle size analysis was performed using a Zetasizer3000 instrument. Powder X-ray diffraction (PXRD) was carried out on a Rigaku D/MAX 2550 diffractometer with  $\text{Cu-K}\alpha$  radiation, 40 kV, 20 mA with the  $2\theta$  range of 10°~80° (scanning rate of 10°  $\text{min}^{-1}$ ) at room temperature. Nitrogen sorption isotherm measurement was performed on a Micro Meritics surface area and pore size analyzer. Before measurement, sample was degassed at 100°C for least 12 h. A sample of ca. 100 mg and a UHP-grade nitrogen (99.999%) gas source were used in the nitrogen sorption measurements at 77 K and collected on a Quantachrome Quadrasorb apparatus. BET surface area was determined over a  $P/P_0$  range from 0.01 to 0.20. Nonlocal density functional theory (NL-DFT) pore size distribution was determined using the carbon/slit-cylindrical pore mode of the Quadrawin software. Ultraviolet absorption (UV) spectrum was determined with TU-1901 double beam UV-vis spectrophotometer. The fluorescence (excitation and emission) spectra of the samples were determined with a Hitachi F-7000 fluorescence spectrophotometer using a monochromated Xe lamp as an excitation source.

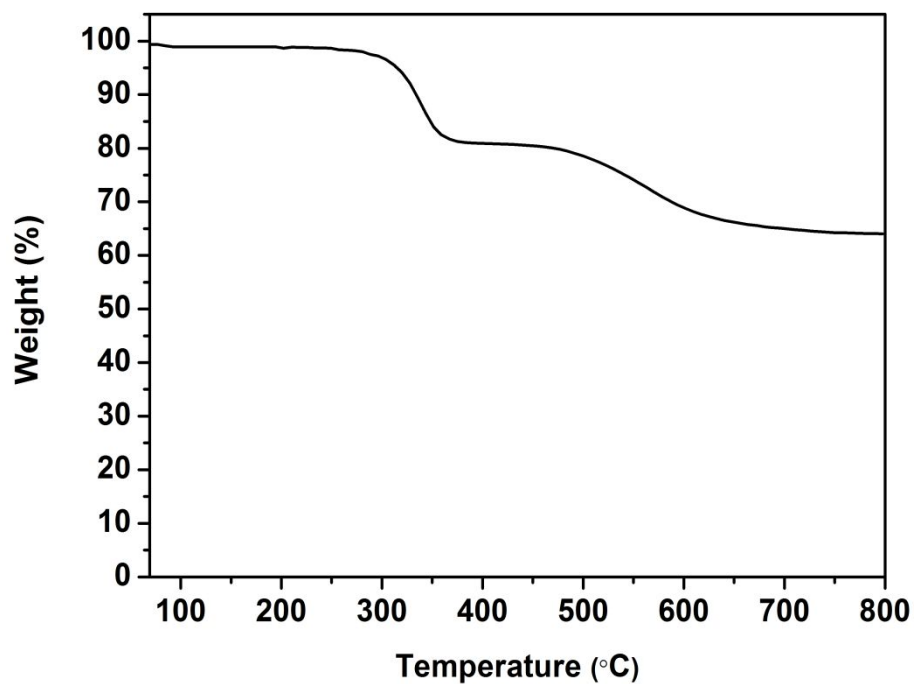

**Figure S1.** TGA curve of IPF under N<sub>2</sub> atmosphere with a heating rate of 10°C min<sup>-1</sup>

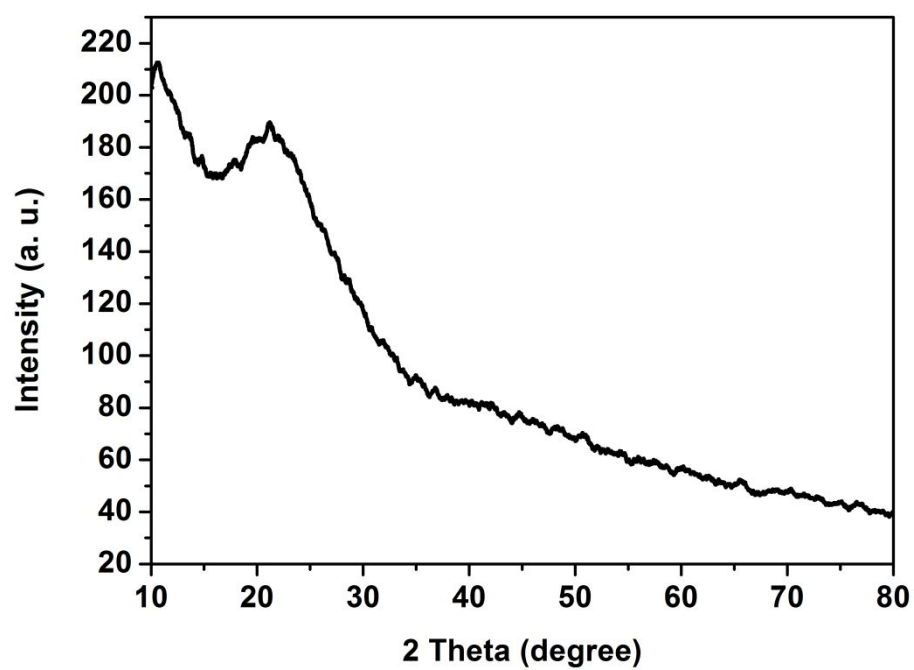

**Figure S2.** PXRD pattern of IPF

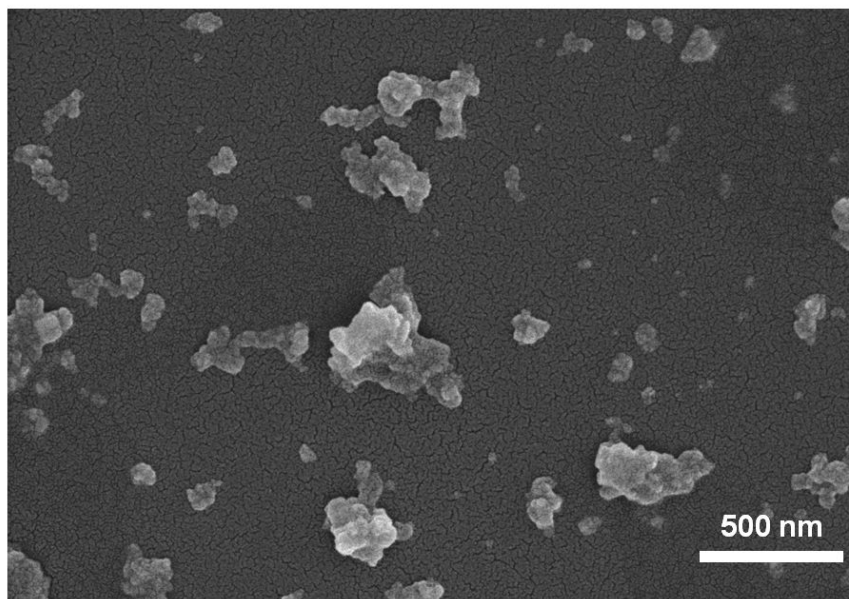

**Figure S3.** FE-SEM image of IPF

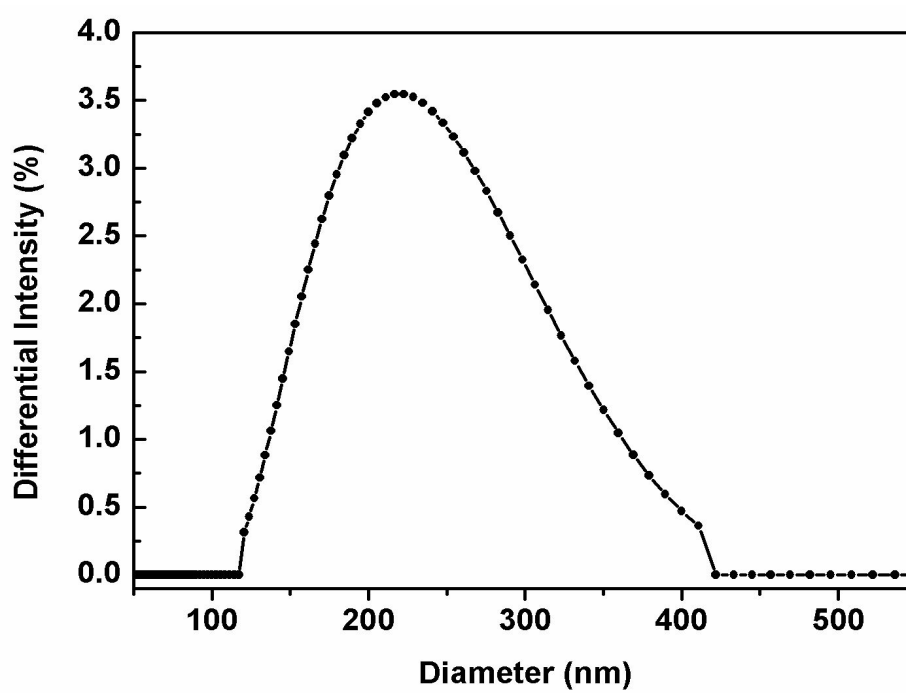

**Figure S4.** Particle size distribution of IPF suspension in water (5.0 mM)

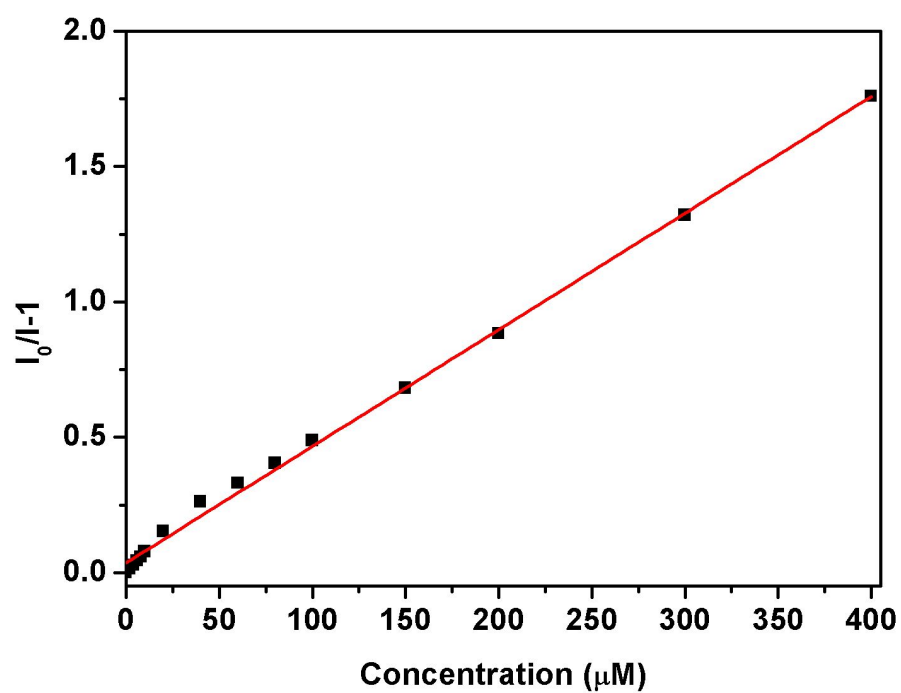

**Figure S5.** Stern–Volmer plot for IPF dispersion in the presence of  $I^-$  ( $R^2 = 0.997$ )

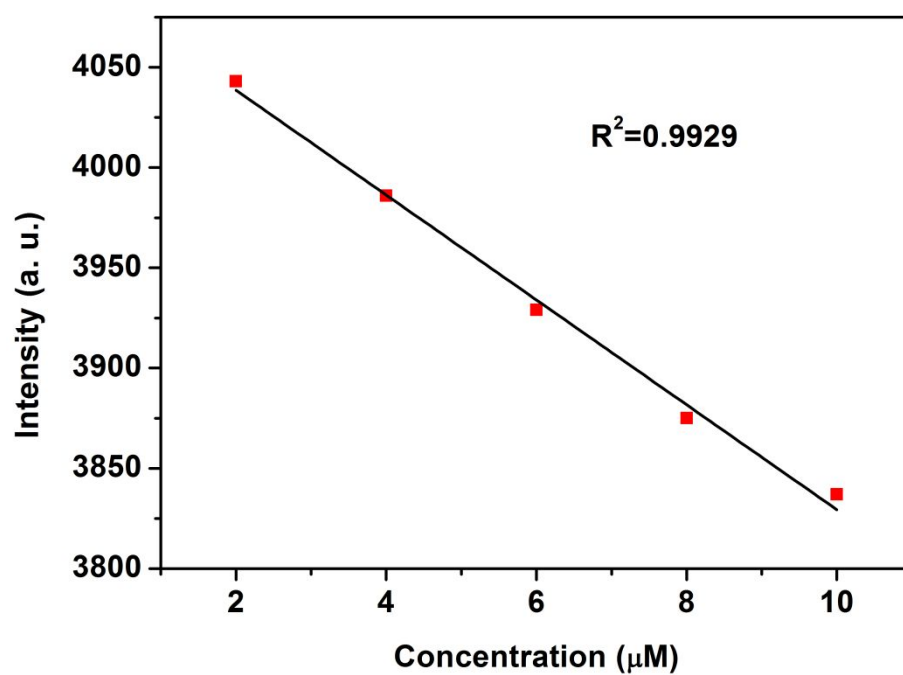

**Figure S6.** Plot of emission intensity at 400 nm versus the concentration of  $I^-$  (1 ~ 10 μM)

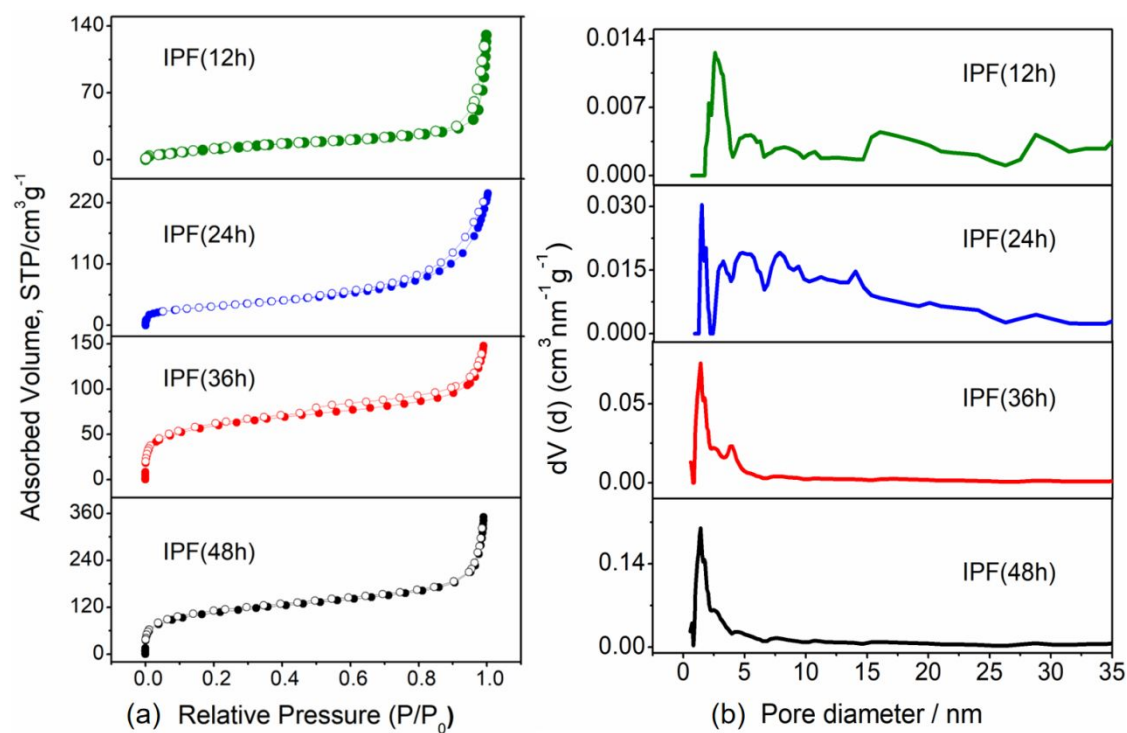

**Figure S7.** (a-b) Nitrogen adsorption-desorption isotherms (a) and pore size distribution curves (b) of IPF prepared with the reaction times at 12 h, 24 h, 36 h, and 48 h.

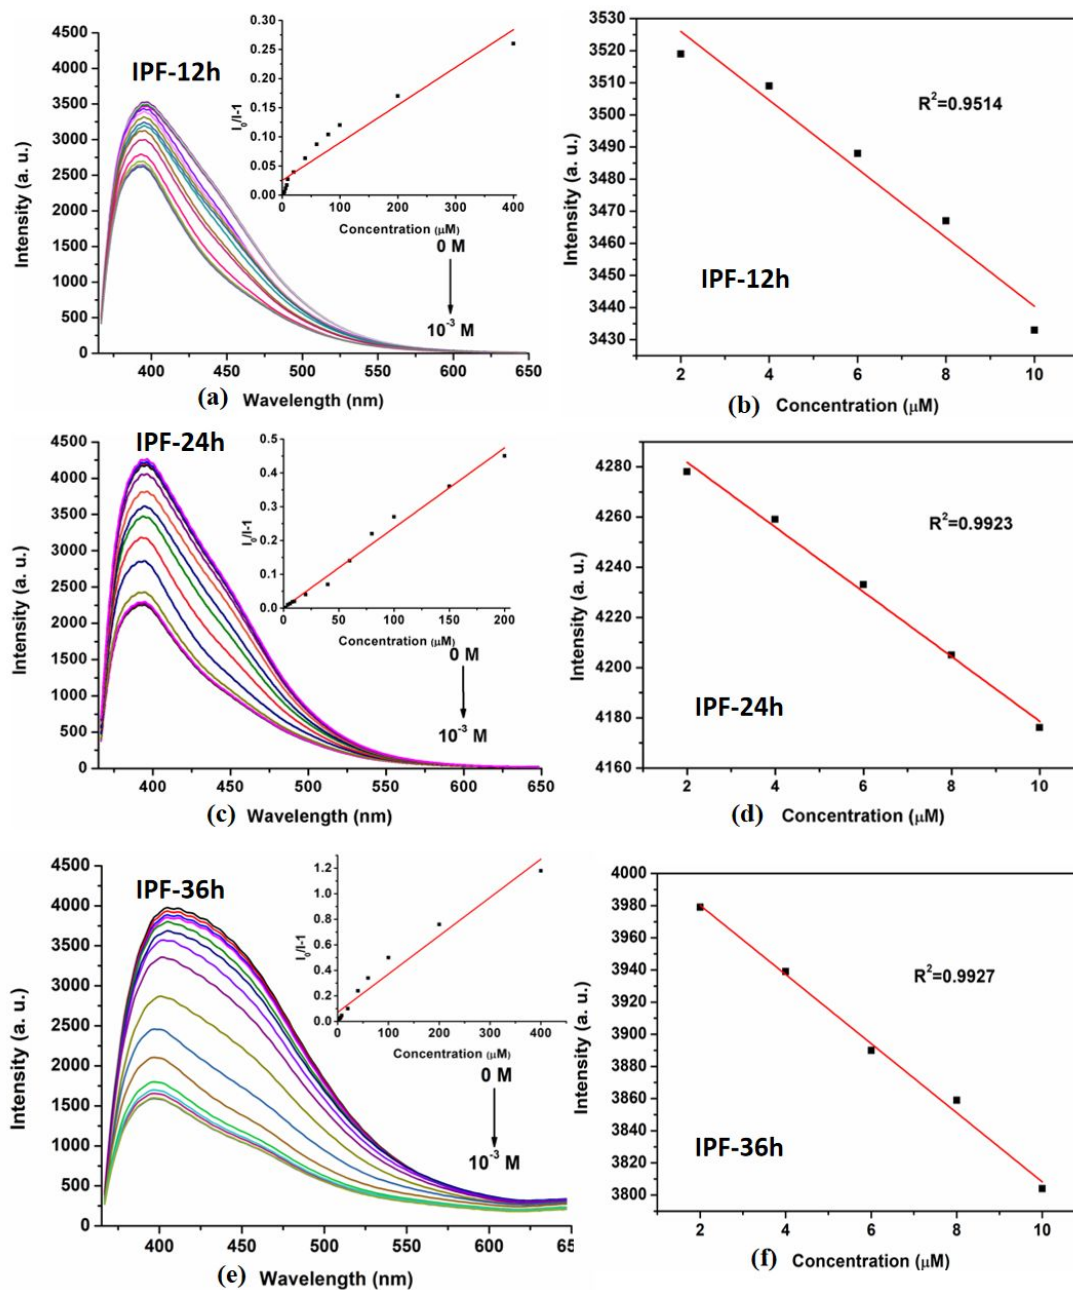

**Figure S8.** (a, c, e) Fluorescence quenching spectra of IPF prepared with the reaction time at 12 h (a), 24 h (c), and 36 h (e) suspensions in water (0.1 mg/mL) with various concentrations of  $I^-$  ( $0 \sim 1 \times 10^{-3}$  mol/L,  $\lambda_{\text{ex}} = 345$  nm). The insets show the photographs of Stern–Volmer plot for IPF-12h ( $R^2 = 0.927$ ), IPF-24h ( $R^2 = 0.977$ ), IPF-36h ( $R^2 = 0.952$ ) suspensions in the presence of  $I^-$ . (b, d, f) Plot of emission intensity of IPF prepared with the reaction time at 12 h (b), 24 h (d), and 36 h (f) suspensions versus the concentration of  $I^-$  ( $1 \sim 10$   $\mu$ M).



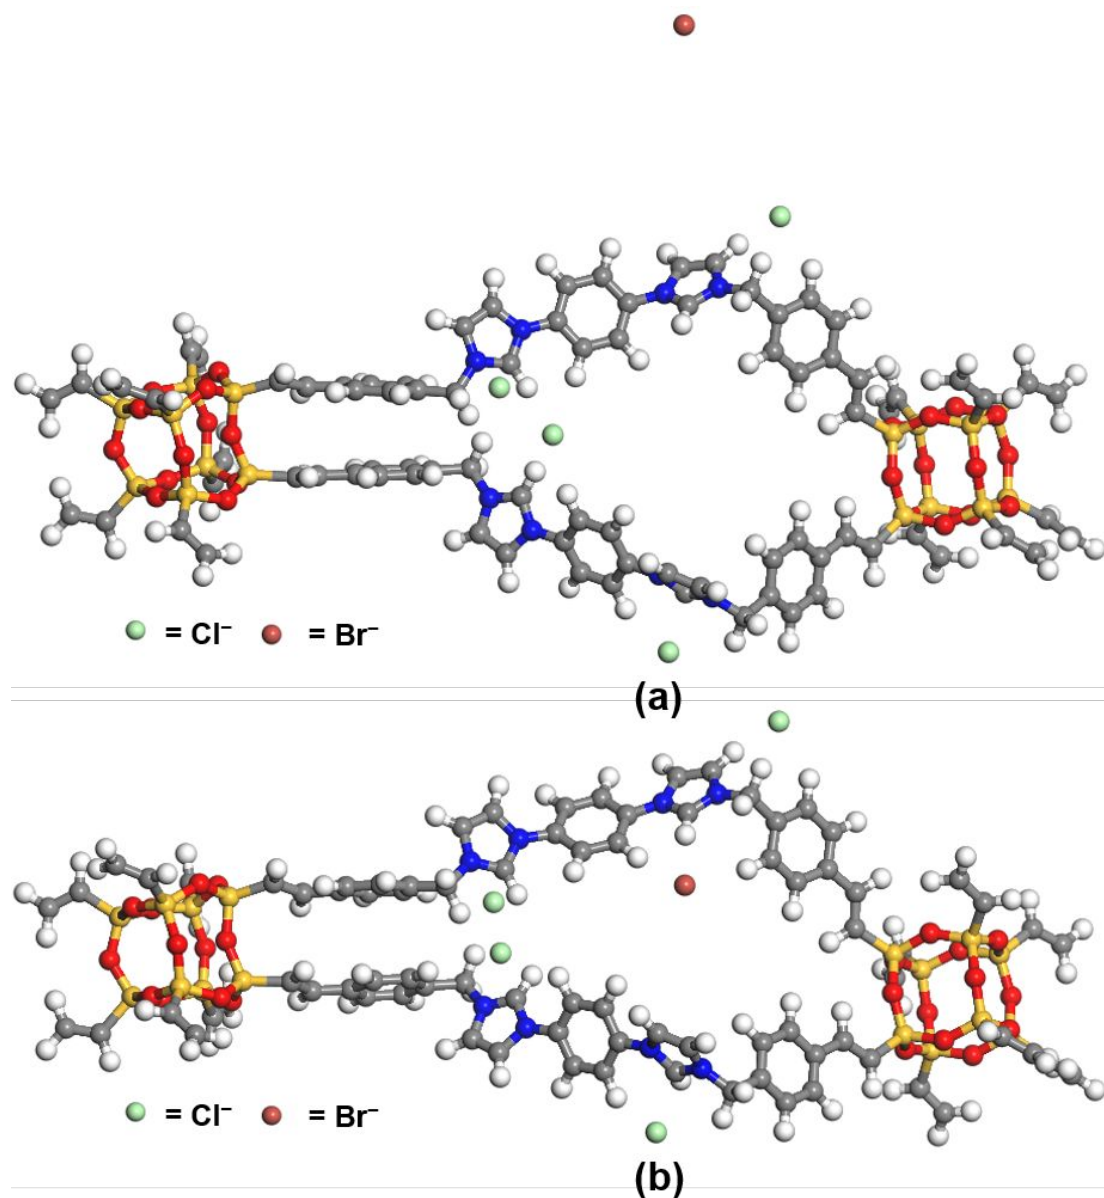

**Figure S9.** (a-b) The idealized geometry of IPF sensing  $\text{Br}^-$  by placing one iodide ion outside (a) and inside the pore (b) optimized by Material studio 8.0 using LDA/PWC as the force field (black: carbon atom; white: hydrogen atom; brown: bromine atom; green: chlorine atom; yellow: silicon atom; red: oxygen atom). We hypothesize that no destruction of the cage silsesquioxane units occurred after the formation of porous structure.

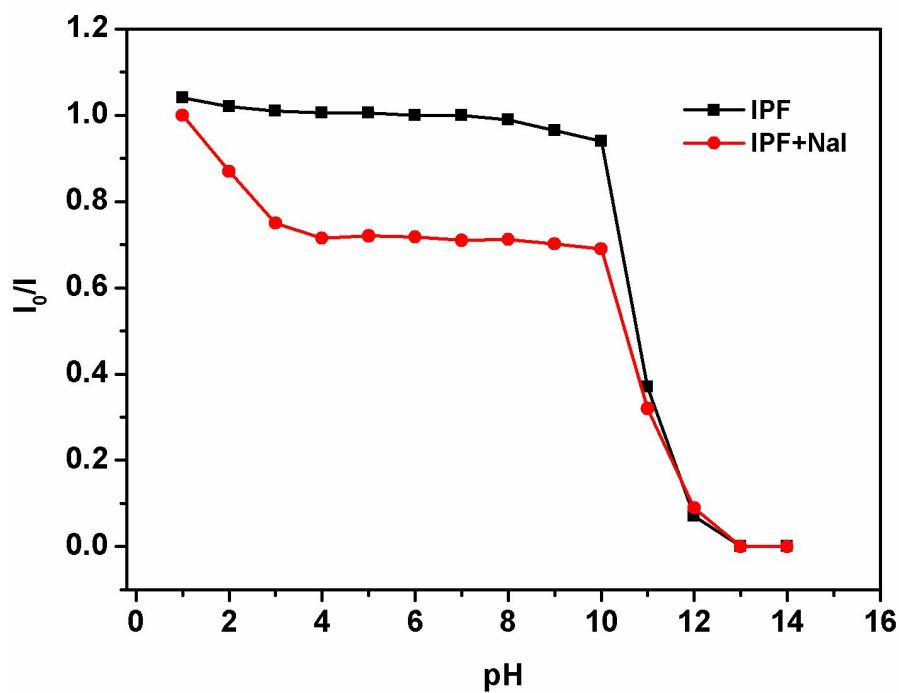

**Figure S10.** The pH effect on the detection performance of IPF dispersion in the absence and presence of  $I^-$

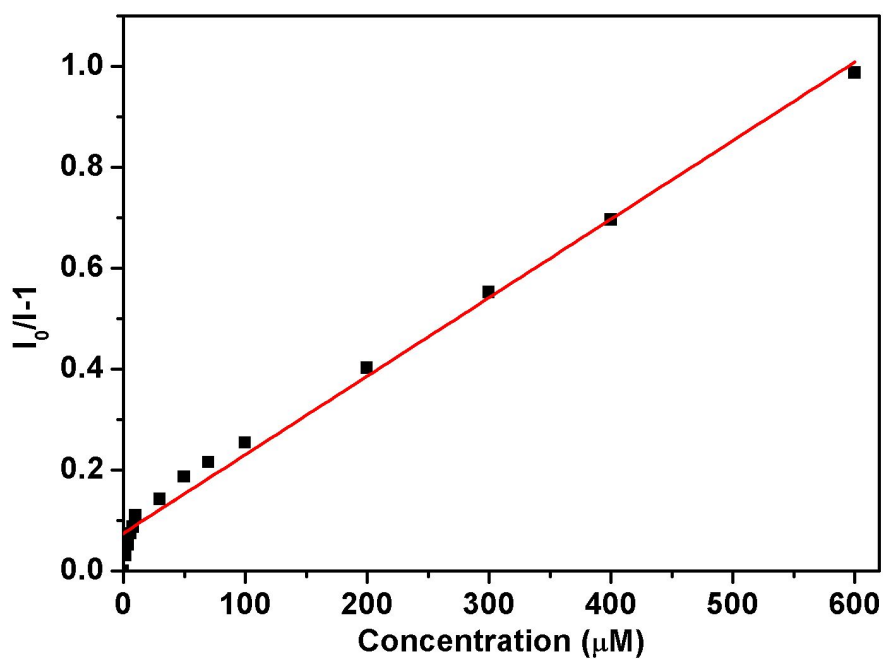

**Figure S11.** Stern–Volmer plot (0~600  $\mu M$ ) for the paper strips in the presence of  $I^-$  ( $R^2 = 0.9874$ )

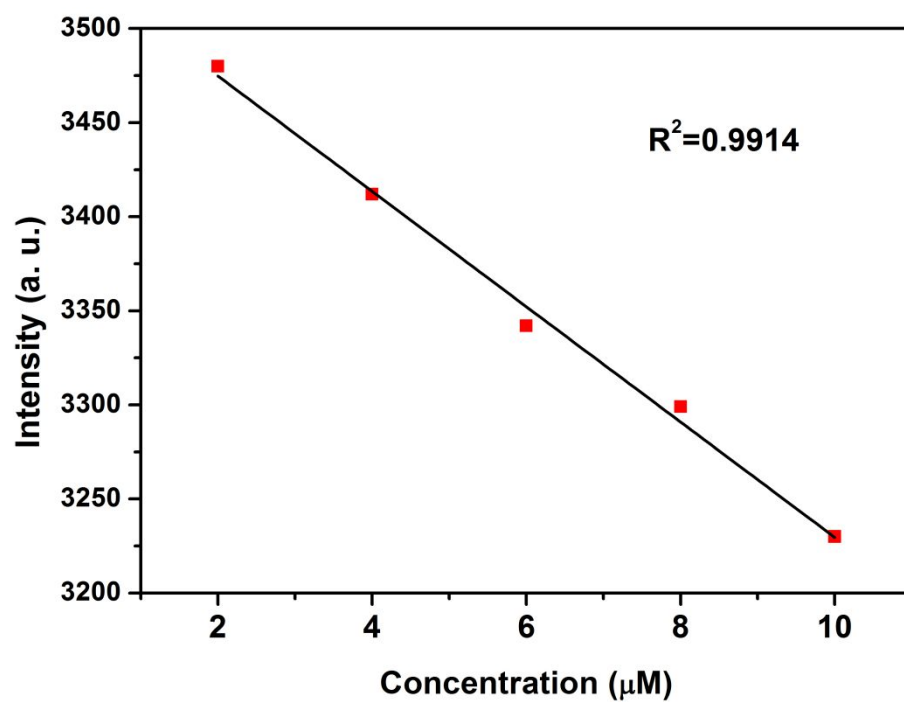

**Figure S12.** Plot of emission intensity at 405 nm versus the concentration of  $I^-$  (1 ~ 10  $\mu M$ )

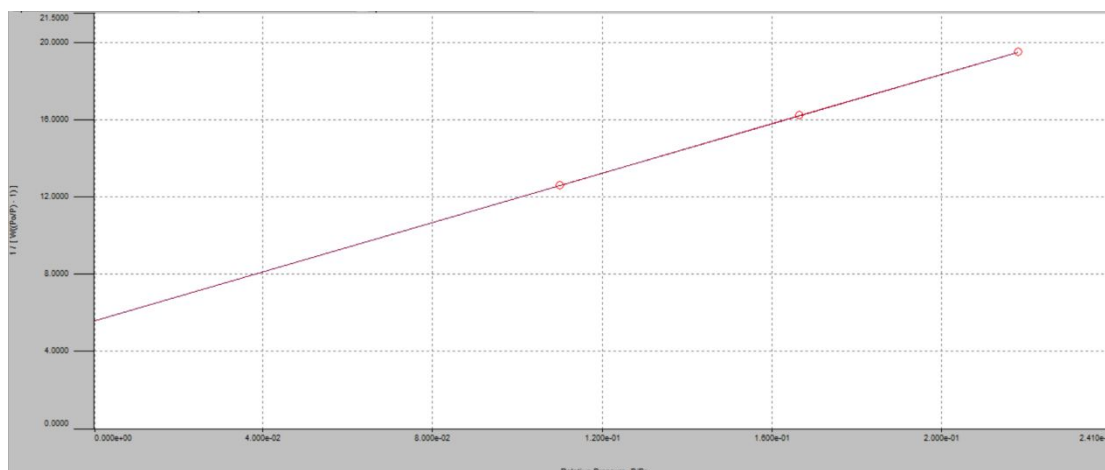

**Figure S13.** BET plot of IPF prepared with the reaction time at 12 h ( $r = 0.999998$ ,  $C = 12.429$ )

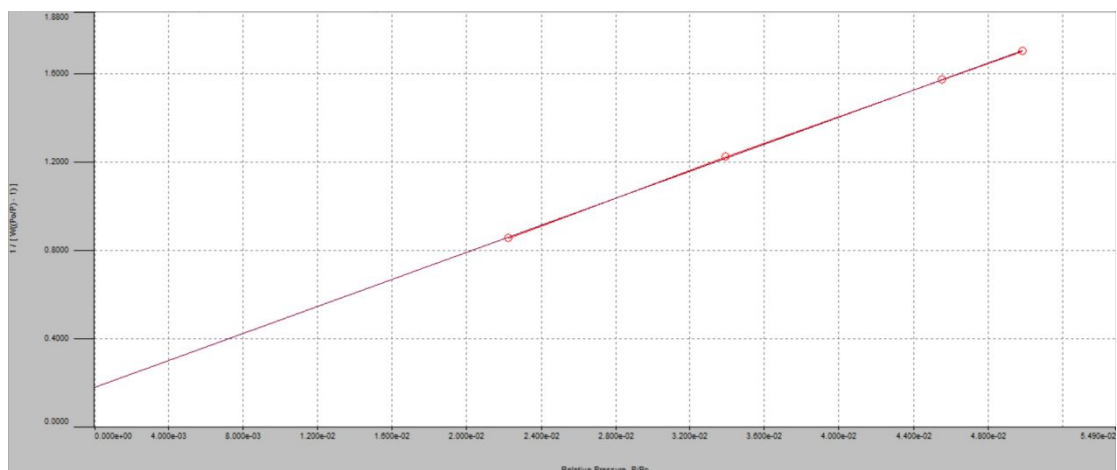

**Figure S14.** BET plot of IPF prepared with the reaction time at 24 h ( $r = 0.999908$ ,  $C = 173.655$ )

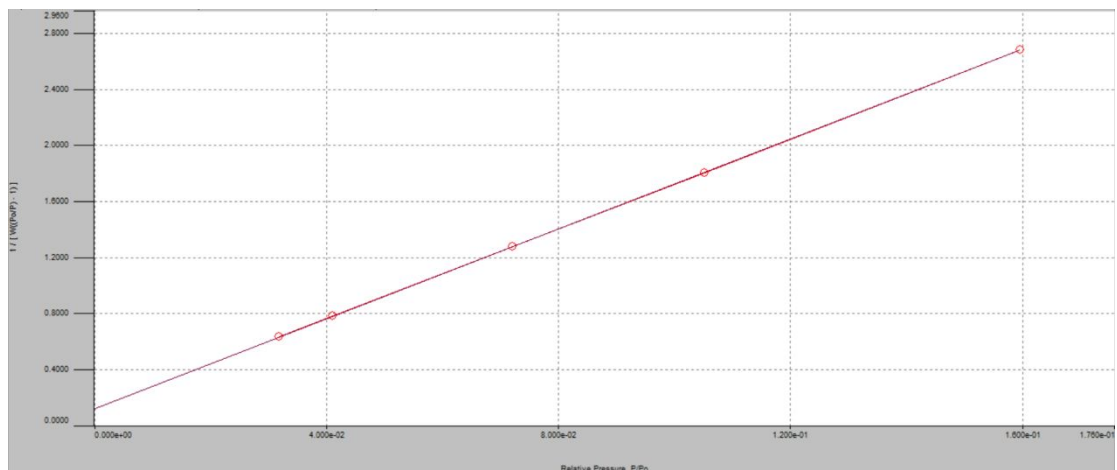

**Figure S15.** BET plot of IPF prepared with the reaction time at 36 h ( $r = 0.999988$ ,  $C = 133.406$ )

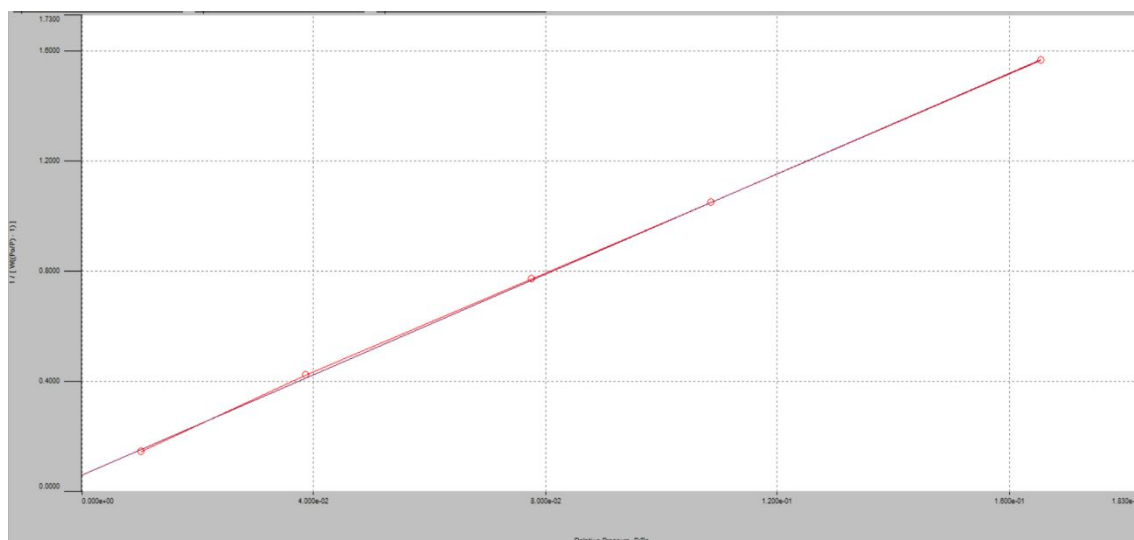

**Figure S16.** BET plot of IPF prepared with the reaction time at 48 h ( $r = 0.999901$ ,  $C = 157.827$ )

**Table S1.** Porosity data of IPF prepared with the reaction times at 12 h, 24 h, 36 h, and 48 h.

| IPF        | $S_{\text{BET}}^{[\text{a}]}/\text{m}^2 \text{ g}^{-1}$ | $S_{\text{micro}}^{[\text{b}]}/\text{m}^2 \text{ g}^{-1}$ | $V_{\text{total}}^{[\text{c}]}/\text{cm}^3 \text{ g}^{-1}$ | $V_{\text{micro}}^{[\text{d}]}/\text{cm}^3 \text{ g}^{-1}$ | $V_{\text{micro}}/V_{\text{total}}$ |
|------------|---------------------------------------------------------|-----------------------------------------------------------|------------------------------------------------------------|------------------------------------------------------------|-------------------------------------|
| IPF (12 h) | 50                                                      | 2.95                                                      | 0.20                                                       | 0.04                                                       | 0.2                                 |
| IPF (24 h) | 113                                                     | 0                                                         | 0.36                                                       | 0                                                          | 0                                   |
| IPF (36 h) | 215                                                     | 123                                                       | 0.23                                                       | 0.05                                                       | 0.22                                |
| IPF (48 h) | 379                                                     | 227                                                       | 0.53                                                       | 0.10                                                       | 0.19                                |

[a] Surface area calculated from  $\text{N}_2$  adsorption isotherm using the BET method; [b] Microporous surface area calculated from  $\text{N}_2$  adsorption isotherm using  $t$ -plot method; [c] Total pore volume calculated at  $P/P_0 = 0.99$ ; [d] Micropore volume derived using the  $t$ -plot method based on the de Boer thickness equation.
